# Supplementary material
Source: PubMed Central journal article supplement (PMC6442038)
Supplement: supp_RA119.007472_143020_1_supp_277767_pm4xml.pdf [file supp_RA119.007472_143020_1_supp_277767_pm4xml.pdf]

**Table S1: KO target sequences**

| Target sequence | Oligonucleotide Sequence | Oligonucleotide Sequence                          | Species                                           |         |
|-----------------|--------------------------|---------------------------------------------------|---------------------------------------------------|---------|
| SLC35A2-KO4     | GGTGGTTCCACCGCGCGCCCGG   | SLC35A2-KO4-F<br><b>cacc</b> GGTGGTTCCACCGCGCGCC  | SLC35A2-KO4-R<br><b>aaac</b> GGCGCCGCGGTGGAACCACC | human   |
| SLC35A2-KO1     | GTGGATCTACCGCTGCGGCCGGG  | SLC35A2-KO1-F<br><b>cacc</b> GTGGATCTACCGCTGCGGCC | SLC35A2-KO1-R<br><b>aaac</b> GGCCGCAGCGGTAGATCCAC | mouse   |
| PIGS-KO1        | GCCGCGGTGGCCATTCTGTGGG   | PIGS-KO1-F<br><b>cacc</b> GCCGCGGTGGCCATTCTGT     | PIGS-KO1-R<br><b>aaac</b> AGCAGAATGGCCACCGCGGC    | hamaser |
| SLC35A2-KO2     | GTCATGGCTGAAGTGCTTAAAGG  | SLC35A2-KO2-F<br><b>cacc</b> GTCATGGCTGAAGTGCTTAA | SLC35A2-KO2-R<br><b>aaac</b> TTAAGCACTTCAGCCATGAC | hamaser |
| PGAP2-KO2       | GTCCCTGCTTCCACTTCAAGG    | PGAP2-KO2-F<br><b>cacc</b> GTCCCTGCTTCCACTTCA     | PGAP2-KO2-R<br><b>aaac</b> TGAAGTGGAAAGAGCAGGGAC  | hamaser |
| PIGZ-KO1        | GATGGCAGCCAGGGTGATTTGGG  | PIGZ-KO1-F<br><b>cacc</b> GATGGCAGCCAGGGTGATTT    | PIGZ-KO1-R<br><b>aaac</b> AAATCACCTGGCTGCCATC     | hamaser |

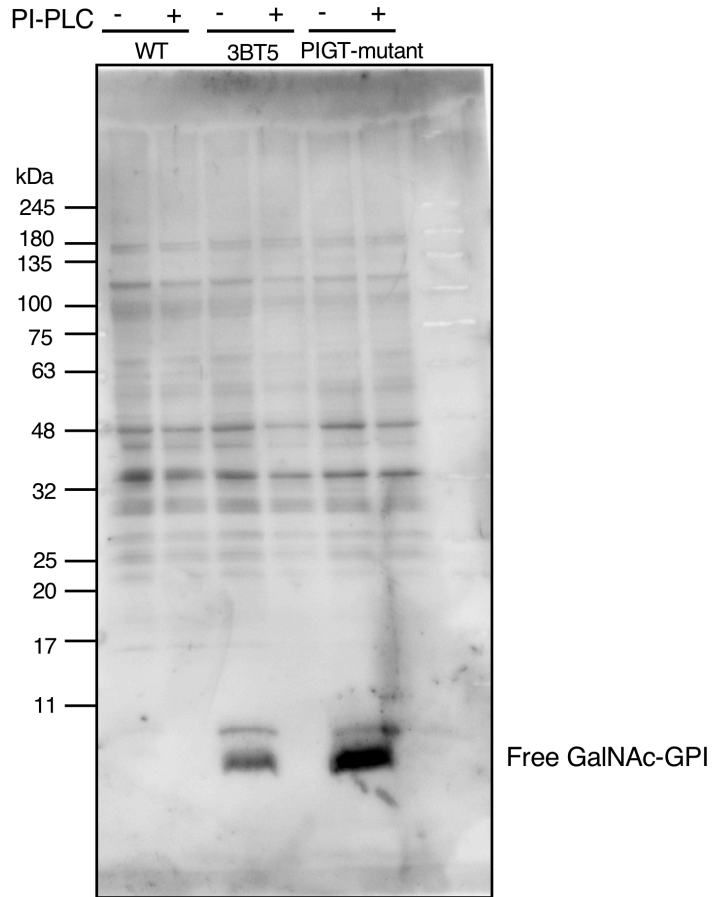

**Figure S1.** Unprocessed image of immunoblot using T5 mAb. Western blotting of free GPIs of 3B2A, 3BT5 and PIGT-mutant CHO cells. Lysates of WT (3B2A), 3BT5 and PIGT-mutant cells treated with or without PI-PLC were analyzed by western blotting with T5 mAb.

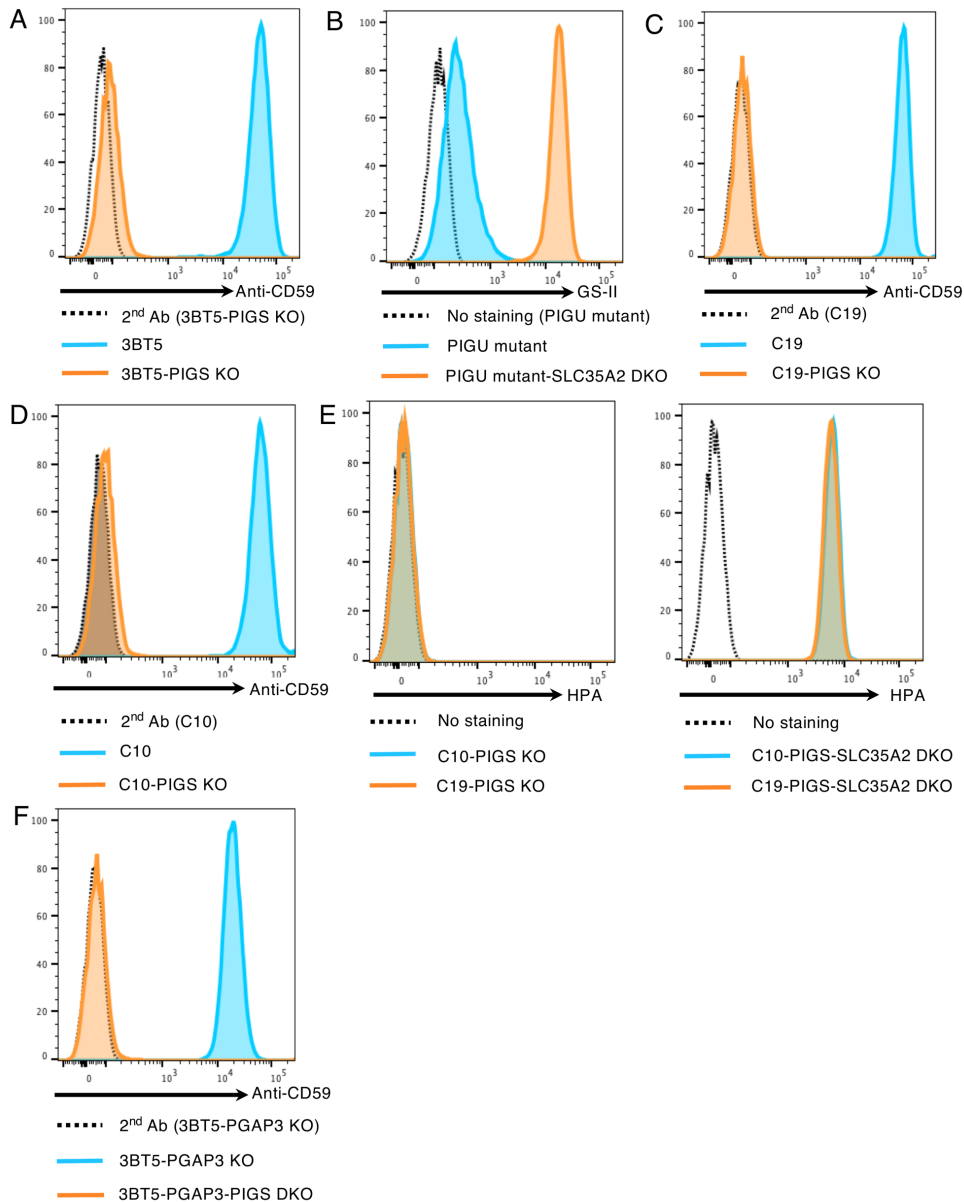

**Figure S2.** Confirmation of knockout (KO) of PIGS and SLC35A2. (A) Confirmation of KO of PIGS in CHO-3BT5 cells. 3BT5 and 3BT5-PIGS KO cells were stained with anti-CD59. (B) Confirmation of KO of SLC35A2 in PIGU-mutant CHO cells. PIGU-mutant and PIGU-mutant-SLC35A2 KO CHO cells were stained with lectin GS-II. (C) Confirmation of KO of PIGS in C19 cells. C19 and C19-PIGS KO cells were stained with anti-CD59. (D) Confirmation of KO of PIGS in C10 cells. C10 and C10-PIGS KO cells were stained with anti-CD59. (E) Confirmation of KO of SLC35A2 in C10-PIGS KO and C19-PIGS KO cells. C10-PIGS KO and C19-PIGS KO CHO cells (left), and C10-PIGS-SLC35A2 DKO and C19-PIGS-SLC35A2 DKO CHO cells (right) were stained with lectin HPA, which binds to GalNAc exposed *O*-glycan. (F) Confirmation of KO of PIGS in 3BT5-PGAP3 KO cells. 3BT5-PGAP3 KO and 3BT5-PGAP3-PIGS DKO cells were stained with anti-CD59.

### PIGZ

**WT**      **ATG**AA**GATGGCAGCCAGGGTGATT**GGGGTAGCCTCAGCCTGCTTCGAGTCTTGTGGTGTCT  
M K M A A R V I W G S L S L L R V L W C L  
TM1

**PIGZ KO** **ATG**AA**GATGGCAGCCAG**-----  
M K M A A R

**WT**      CCTTCCCAGACTGGCTACATACACCCAGATGAGTTCTTCCAGTCACCTGAGGTCATGGCAGA  
L P Q T G Y I H P D E F F Q S P E V M A E  
DE motif

**PIGZ KO**    -----ACTGGCTACATACACCCAGATGAGTTCTTCCAGTCACCTGAGGTCATGGCAGA  
L A T Y T Q M S S S S H L R S W Q

**WT**      GGACATCCTGGGTGTGCAGGCTTCACGGCCCTGGGAATTTACCCAGCAACTCCTGTGCGCAC  
D I L G V Q A S R P W E F Y P S N S C R T

**PIGZ KO** GGACATCCTGGGTGTGCAGGCTTCACGGCCCTGGGAATTTACCCAGCAACTCCTGTGCGCAC  
R T S W V C R L H G P G N F T P A T P V A

**WT**      TGTGGTCTTCCCCCTGCTGA  
V V F P L L

**PIGZ KO** TGTGGTCTTCCCCCTGCTGA  
L W S S P C\*

**Figure S3.** Confirmation of KO of PIGZ by Sanger sequencing. Nucleotide and translated amino acid sequences are aligned for wild-type PIGZ (WT) and gene-edited PIZG (PIGZ KO). Nucleotide sequences are shown from the initiation ATG codon (blue). Twenty nucleotides (red) located 3-nucleotide downstream of the initiation codon are targeted by gRNA. PAM sequence (GGG) is underlined. Sanger sequencing confirmed a deletion of 55 base pairs (dashed region) from within the gRNA target sequence, which caused a frame-shift leading to generation of a premature termination codon (asterisk). A putative catalytic site, DE motif (magenta), within the first transmembrane domain (TM1; underlined) was lost due to the frame-shift. Nucleotides with or without dotted underline are in exon 3 and exon 2, respectively. Exon 2 sequences were determined by Sanger method whereas exon 3 sequence was from the NCBI data base.
